# Supplementary material for: The ZiBuPiYin recipe regulates proteomic alterations in brain mitochondria-associated ER membranes caused by chronic psychological stress exposure: Implications for cognitive decline in Zucker diabetic fatty rats
Source: publisher site journal article supplement (doi:10.18632/aging.103894), 2020-11-18
Supplement: Supplementary file [file aging-v12i23-103894-supplementary-material-SD2.pdf]

## SUPPLEMENTARY TABLES

**Supplementary Table 1. Identified proteins known to localize in MAM and associated with diabetes mellitus and cognitive impairment-related disease (UP: unique peptides).**

| Gene    | Diabetes mellitus associated proteins                                          | UP | Note    |
|---------|--------------------------------------------------------------------------------|----|---------|
| Nefl    | Neurofilament light polypeptide                                                | 20 | a       |
| Hspd1   | 60 kDa heat shock protein, mitochondrial                                       | 17 | a, b    |
| Dld     | Dihydrolipoyl dehydrogenase, mitochondrial                                     | 13 | a, b    |
| Mog     | Myelin-oligodendrocyte glycoprotein                                            | 10 | a       |
| Syn2    | Synapsin II, isoform CRA_a                                                     | 10 | a       |
| Map6    | Microtubule-associated protein 6                                               | 10 | b       |
| Gsn     | Gelsolin                                                                       | 9  | a       |
| Sv2a    | Synaptic vesicle glycoprotein 2A                                               | 9  | a       |
| Psap    | Prosaposin                                                                     | 9  | a       |
| Ctsd    | Cathepsin D                                                                    | 7  | a, b    |
| Lrp1    | LDL receptor related protein 1                                                 | 7  | a       |
| Marcks  | Myristoylated alanine-rich C-kinase substrate                                  | 7  | a       |
| Nefh    | Neurofilament heavy polypeptide                                                | 7  | a       |
| COX2    | cytochrome c oxidase subunit II                                                | 6  | a, b    |
| Apoe    | Apolipoprotein E                                                               | 5  | a, b, c |
| Pdk1    | [Pyruvate dehydrogenase (acetyl-transferring)] kinase isozyme 1, mitochondrial | 5  | a       |
| S100b   | Protein S100-B                                                                 | 4  | a, b, c |
| Eef1a2  | Elongation factor 1-alpha 2                                                    | 4  | a, b    |
| Pip4k2b | Phosphatidylinositol-5-phosphate 4-kinase type 2 beta                          | 4  | a       |
| Mapk1   | Mitogen-activated protein kinase 1                                             | 3  | a, b    |
| ALG2    | ALG2, alpha-1,3/1,6-mannosyltransferase                                        | 3  | a       |
| Cdc42   | Cell division control protein 42 homolog                                       | 3  | a       |
| Cisd2   | CDGSH iron sulfur domain 2                                                     | 3  | a, b, c |
| Dctn1   | Dynactin subunit 1                                                             | 3  | a       |
| Fis1    | Mitochondrial fission 1 protein                                                | 2  | a, c    |
| Tmed10  | Transmembrane emp24 domain-containing protein 10                               | 2  | a       |
| Dnajc5  | DnaJ homolog subfamily C member 5                                              | 2  | a       |
| Vti1b   | Vesicle transport through interaction with t-SNAREs homolog 1B                 | 2  | a       |
| Gapdh   | Glyceraldehyde-3-phosphate dehydrogenase                                       | 1  | a, b    |
| ND2     | NADH-ubiquinone oxidoreductase chain 2                                         | 1  | a       |
| Lamp2   | Lysosome-associated membrane glycoprotein 2                                    | 1  | a       |
| Psm2    | 26S proteasome non-ATPase regulatory subunit 2                                 | 1  | a       |
| Cnnm1   | Cyclin M1 (Predicted)                                                          | 1  | a       |
| Dbnl    | Drebrin-like protein                                                           | 1  | b       |
| Bcap31  | B-cell receptor-associated protein 31                                          | 1  | c       |

a, Cognitive impairment-related disease associated proteins; b, Diabetes mellitus-associated proteins; c, Known MAM-localized proteins.

**Supplementary Table 2. Functional clusters of significant MAM protein changes in PSD:ZDF group.**

| Sequence name | Gene name | Protein name                                                  | UP | FC   | p-value |
|---------------|-----------|---------------------------------------------------------------|----|------|---------|
| Q6AY58        | Bcap31    | B-cell receptor-associated protein 31                         | 1  | 2.68 | 0.0203  |
| F1LLX8        | Lamp2     | Lysosome-associated membrane glycoprotein 2                   | 1  | 2.25 | 0.0498  |
| Q6IFW6        | Krt10     | Keratin, type I cytoskeletal 10                               | 6  | 2.18 | 0.0367  |
| P30009        | Marecks   | Myristoylated alanine-rich C-kinase substrate                 | 7  | 1.48 | 0.0027  |
| Q68FQ0        | Cct5      | T-complex protein 1 subunit epsilon                           | 9  | 1.44 | 0.0258  |
| Q4FZT9        | Psm2      | 26S proteasome non-ATPase regulatory subunit 2                | 1  | 1.42 | 0.0130  |
| Q7TNM3        | OMG       | Oligodendrocyte-myelin glycoprotein                           | 7  | 1.42 | 0.0127  |
| P13638        | Atp1b2    | Sodium/potassium-transporting ATPase subunit beta-2           | 5  | 1.39 | 0.0300  |
| Q9Z270        | Vapa      | Vesicle-associated membrane protein-associated protein A      | 6  | 1.38 | 0.0276  |
| Q6JAM9        | Tmem35    | Transmembrane protein 35                                      | 1  | 1.38 | 0.0094  |
| D3ZEI4        | Hepacm    | Hepatocyte cell adhesion molecule                             | 3  | 1.37 | 0.0308  |
| P31647        | Slc6a11   | Sodium- and chloride-dependent GABA transporter 3             | 8  | 1.37 | 0.0464  |
| P02650        | ApoE      | Apolipoprotein E                                              | 5  | 1.34 | 0.0421  |
| B0BNM7        | Sco1      | Sco1 protein                                                  | 1  | 1.34 | 0.0130  |
| Q6AY84        | Scrn1     | Secernin-1                                                    | 5  | 1.32 | 0.0062  |
| Q88377        | Pip4k2b   | Phosphatidylinositol 5-phosphate 4-kinase type-2 beta         | 4  | 1.32 | 0.0283  |
| P23562        | Slc4a1    | Band 3 anion transport protein                                | 8  | 1.32 | 0.0086  |
| P63086        | Mapk1     | Mitogen-activated protein kinase 1                            | 3  | 1.32 | 0.0192  |
| Q63345        | Mog       | Myelin-oligodendrocyte glycoprotein                           | 10 | 1.32 | 0.0342  |
| Q812E9        | Gpm6a     | Neuronal membrane glycoprotein M6-a                           | 5  | 1.29 | 0.0495  |
| Q6PST4        | At11      | Atlantin-1                                                    | 3  | 1.28 | 0.0175  |
| D4AAE9        | Cisd2     | CDGSH iron sulfur domain 2                                    | 3  | 1.28 | 0.0167  |
| G3V7P1        | Stx12     | Syntaxin-12                                                   | 3  | 1.27 | 0.0016  |
| Q3MHS9        | Cct6a     | Chaperonin containing Tcp1, subunit 6A (Zeta 1)               | 7  | 1.27 | 0.0099  |
| Q5RKJ9        | RAB10     | RAB10, member RAS oncogene family                             | 6  | 1.26 | 0.0105  |
| F1LMR7        | Dpp6      | Dipeptidyl aminopeptidase-like protein 6                      | 9  | 1.26 | 0.0169  |
| Q68FP1        | Gsn       | Gelsolin                                                      | 9  | 1.26 | 0.0487  |
| G3V9B3        | Mag       | Myelin-associated glycoprotein                                | 10 | 1.25 | 0.0017  |
| Q02563        | Sv2a      | Synaptic vesicle glycoprotein 2A                              | 9  | 1.24 | 0.0444  |
| Q5RKI0        | Wdr1      | WD repeat-containing protein 1                                | 8  | 1.24 | 0.0372  |
| A0A096MJM1    | Rhog      | Ras homolog family member G                                   | 7  | 1.24 | 0.0019  |
| P62909        | Rps3      | 40S ribosomal protein S3                                      | 3  | 1.23 | 0.0125  |
| P63322        | Rala      | Ras-related protein Ral-A                                     | 4  | 1.22 | 0.0347  |
| Q6PEC4        | Skp1      | S-phase kinase-associated protein 1                           | 3  | 1.22 | 0.0027  |
| Q5FVQ4        | Mlec      | Malectin                                                      | 3  | 1.22 | 0.0167  |
| P97710        | Sirpa     | Tyrosine-protein phosphatase non-receptor type substrate 1    | 6  | 1.21 | 0.0176  |
| B0BNM1        | Apoa1bp   | NAD(P)H-hydrate epimerase                                     | 3  | 0.83 | 0.0340  |
| P63100        | Ppp3r1    | Calcineurin subunit B type 1                                  | 6  | 0.83 | 0.0433  |
| G3V6P8        | Gng12     | Guanine nucleotide-binding protein subunit gamma              | 3  | 0.82 | 0.0103  |
| P23965        | Eci1      | Enoyl-CoA delta isomerase 1, mitochondrial                    | 7  | 0.82 | 0.0254  |
| G3V733        | Syn2      | Synapsin II, isoform CRA_a                                    | 10 | 0.82 | 0.0197  |
| Q5XIH3        | Ndufv1    | NADH dehydrogenase [ubiquinone] flavoprotein 1, mitochondrial | 16 | 0.81 | 0.0425  |
| P38718        | Mpc2      | Mitochondrial pyruvate carrier 2                              | 3  | 0.81 | 0.0186  |
| Q09073        | Slc25a5   | ADP/ATP translocase 2                                         | 2  | 0.81 | 0.0123  |
| Q5EBA4        | Nipsnap1  | Nipsnap1 protein                                              | 7  | 0.79 | 0.0426  |
| F1M6X5        | Txnrd2    | Thioredoxin reductase 2, mitochondrial                        | 6  | 0.78 | 0.0449  |
| P19627        | Gnaz      | Guanine nucleotide-binding protein G(z) subunit alpha         | 5  | 0.78 | 0.0298  |
| P41565        | Idh3g     | Isocitrate dehydrogenase [NAD] subunit gamma 1, mitochondrial | 8  | 0.78 | 0.0090  |
| P60905        | Dnajc5    | DnaJ homolog subfamily C member 5                             | 2  | 0.77 | 0.0353  |

|            |          |                                                                                |    |      |        |
|------------|----------|--------------------------------------------------------------------------------|----|------|--------|
| D4A1C0     | Cnm1     | Cyclin M1 (Predicted)                                                          | 1  | 0.76 | 0.0407 |
| B2GV06     | Oxct1    | Succinyl-CoA:3-ketoacid coenzyme A transferase 1, mitochondrial                | 17 | 0.76 | 0.0343 |
| G3V6H5     | Slc25a11 | Mitochondrial 2-oxoglutarate/malate carrier protein                            | 13 | 0.75 | 0.0444 |
| Q80W89     | Ndufa11  | NADH dehydrogenase [ubiquinone] 1 alpha subcomplex subunit 11                  | 3  | 0.74 | 0.0145 |
| F1MA54     | Pdk1     | [Pyruvate dehydrogenase (acetyl-transferring)] kinase isozyme 1, mitochondrial | 5  | 0.74 | 0.0411 |
| F1LRZ7     | Nefh     | Neurofilament heavy polypeptide                                                | 7  | 0.72 | 0.0150 |
| Q6TUG0     | Dnajb11  | DnaJ homolog subfamily B member 11                                             | 1  | 0.72 | 0.0287 |
| F8WG67     | Acot7    | Acyl-CoA thioesterase 7, isoform CRA_a                                         | 3  | 0.71 | 0.0040 |
| B4F7C2     | Tubb4a   | Tubulin beta chain                                                             | 5  | 0.70 | 0.0201 |
| B2GV73     | Arpc3    | Actin-related protein 2/3 complex subunit 3                                    | 1  | 0.69 | 0.0095 |
| A0A097PE04 | COX2     | Cytochrome c oxidase subunit 2                                                 | 6  | 0.69 | 0.0311 |
| Q6P6R2     | Dld      | Dihydrolipoyl dehydrogenase, mitochondrial                                     | 13 | 0.68 | 0.0303 |
| Q8CFN2     | Cdc42    | Cell division control protein 42 homolog                                       | 3  | 0.68 | 0.0243 |
| P56522     | Fdxr     | NADPH:adrenodoxin oxidoreductase, mitochondrial                                | 9  | 0.68 | 0.0084 |
| Q9R170     | Bcat1    | Branched-chain-amino-acid aminotransferase                                     | 3  | 0.68 | 0.0341 |
| P49432     | Pdhh     | Pyruvate dehydrogenase E1 component subunit beta, mitochondrial                | 13 | 0.66 | 0.0235 |
| P63039     | Hspd1    | 60 kDa heat shock protein, mitochondrial                                       | 17 | 0.65 | 0.0438 |
| Q6PDU7     | Atp5l    | ATP synthase subunit g, mitochondrial                                          | 3  | 0.64 | 0.0007 |
| P19527     | Nefl     | Neurofilament light polypeptide                                                | 20 | 0.64 | 0.0170 |
| P04631     | S100b    | Protein S100-B                                                                 | 4  | 0.64 | 0.0053 |
| B0BNK1     | Rab5c    | RAB5C, member RAS oncogene family                                              | 4  | 0.63 | 0.0087 |
| Q5I0L3     | Yars2    | Tyrosine--tRNA ligase, mitochondrial                                           | 2  | 0.63 | 0.0157 |
| Q9JHL4     | Dbnl     | Drebrin-like protein                                                           | 1  | 0.59 | 0.0112 |
| Q6P7S0     | Pkm      | Pyruvate kinase                                                                | 2  | 0.58 | 0.0106 |
| P28023     | Dctn1    | Dynactin subunit 1                                                             | 3  | 0.58 | 0.0256 |
| Q6AYT7     | Abhd12   | Monoacylglycerol lipase ABHD12                                                 | 1  | 0.56 | 0.0410 |
| Q63083     | Nucb1    | Nucleobindin-1                                                                 | 2  | 0.56 | 0.0479 |
| Q5XIG4     | Ociad1   | OCIA domain-containing protein 1                                               | 1  | 0.54 | 0.0040 |
| P84817     | Fis1     | Mitochondrial fission 1 protein                                                | 2  | 0.53 | 0.0175 |
| D4A7V1     | Sh3glb2  | Endophilin-B2                                                                  | 4  | 0.50 | 0.0353 |
| P04797     | Gapdh    | Glyceraldehyde-3-phosphate dehydrogenase                                       | 1  | 0.46 | 0.0095 |
| Q06QE9     | ND2      | NADH-ubiquinone oxidoreductase chain 2                                         | 1  | 0.42 | 0.0158 |
| F1LNC4     | Vti1b    | Vesicle transport through interaction with t-SNAREs homolog 1B                 | 2  | 0.40 | 0.0218 |
| Q6Q0N1     | Cndp2    | Cytosolic non-specific dipeptidase                                             | 3  | 0.33 | 0.0048 |
| Q45QL2     | Gnb4     | Guanine nucleotide binding protein beta-4                                      | 2  | 0.33 | 0.0416 |
| G3V6U3     | Alg2     | ALG2, alpha-1,3/1,6-mannosyltransferase                                        | 3  | 0.31 | 0.0033 |

The color gradient of green and yellow were used to visualize the increased or decreased abundances of PSD proteins compared to the ZDF group, respectively (FC: fold change).

**Supplementary Table 3. Functional clusters of significant MAM protein changes in PDZ:PSD group.**

| Sequence name | Gene name | Protein name                                          | UP | FC   | p-value |
|---------------|-----------|-------------------------------------------------------|----|------|---------|
| G3V6U3        | Alg2      | ALG2, alpha-1,3/1,6-mannosyltransferase               | 3  | 2.87 | 0.0070  |
| Q6Q0N1        | Cndp2     | Cytosolic non-specific dipeptidase                    | 3  | 2.27 | 0.0088  |
| Q6AYT7        | Abhd12    | Monoacylglycerol lipase ABHD12                        | 1  | 2.07 | 0.0453  |
| W0NT55        | Slc4a10   | Anion exchange protein                                | 3  | 1.82 | 0.0214  |
| P04631        | S100b     | Protein S100-B                                        | 4  | 1.73 | 0.0095  |
| P84817        | Fis1      | Mitochondrial fission 1 protein                       | 2  | 1.70 | 0.0418  |
| P04797        | Gapdh     | Glyceraldehyde-3-phosphate dehydrogenase              | 1  | 1.67 | 0.0473  |
| Q06QE9        | ND2       | NADH-ubiquinone oxidoreductase chain 2                | 1  | 1.66 | 0.0315  |
| Q3T1K5        | Capza2    | F-actin-capping protein subunit alpha-2               | 2  | 1.63 | 0.0391  |
| Q6P7S0        | Pkm       | Pyruvate kinase                                       | 2  | 1.51 | 0.0267  |
|               |           | NADH dehydrogenase (Ubiquinone) 1 beta subcomplex, 6  |    |      |         |
| D3ZZ21        | Ndufb6    | (Predicted)                                           | 1  | 1.47 | 0.0273  |
| Q6P7A4        | Psap      | Prosaposin                                            | 9  | 1.45 | 0.0496  |
| Q9JHL4        | Dbnl      | Drebrin-like protein                                  | 1  | 1.44 | 0.0461  |
| Q6PDU7        | Atp51     | ATP synthase subunit g, mitochondrial                 | 3  | 1.42 | 0.0414  |
| B0BNK1        | Rab5c     | RAB5C, member RAS oncogene family                     | 4  | 1.41 | 0.0138  |
| Q6TUG0        | Dnajb11   | DnaJ homolog subfamily B member 11                    | 1  | 1.37 | 0.0423  |
| P24268        | Ctsd      | Cathepsin D                                           | 7  | 1.36 | 0.0141  |
| Q63584        | Tmed10    | Transmembrane emp24 domain-containing protein 10      | 2  | 1.36 | 0.0089  |
| P56522        | Fdxr      | NADPH:adrenodoxin oxidoreductase, mitochondrial       | 9  | 1.33 | 0.0155  |
| F1M6X5        | Txnr2     | Thioredoxin reductase 2, mitochondrial                | 6  | 1.32 | 0.0462  |
| Q9R170        | Bcat1     | Branched-chain-amino-acid aminotransferase, cytosolic | 3  | 1.28 | 0.0449  |
| F8WG67        | Acot7     | Acyl-CoA thioesterase 7, isoform CRA_a                | 3  | 1.28 | 0.0352  |
| Q62703        | Rcn2      | Reticulocalbin-2                                      | 4  | 1.23 | 0.0254  |
| G3V6P8        | Gng12     | Guanine nucleotide-binding protein subunit gamma      | 3  | 1.23 | 0.0009  |
| G3V928        | Lrp1      | LDL receptor-related protein 1                        | 7  | 1.21 | 0.0329  |
| Q63560        | Map6      | Microtubule-associated protein 6                      | 10 | 0.83 | 0.0393  |
| P02650        | ApoE      | Apolipoprotein E                                      | 5  | 0.83 | 0.0359  |
| G3V9B3        | Mag       | Myelin-associated glycoprotein                        | 10 | 0.83 | 0.0041  |
| P62632        | Eef1a2    | Elongation factor 1-alpha 2                           | 4  | 0.81 | 0.0137  |
| Q63327        | Mobp      | Myelin-associated oligodendrocyte basic protein       | 3  | 0.81 | 0.0261  |
| P63086        | Mapk1     | Mitogen-activated protein kinase 1                    | 3  | 0.80 | 0.0295  |
| Q7TNM3        | OMG       | Oligodendrocyte-myelin glycoprotein                   | 7  | 0.77 | 0.0290  |
| Q35987        | Nsfl1c    | NSFL1 cofactor p47                                    | 1  | 0.66 | 0.0028  |

The color gradient of green and yellow were used to visualize the increased or decreased abundances of PDZ proteins compared to the PSD group, respectively.

**Supplementary Table 4. Functional clusters of significant MAM protein changes in PSD:ZDF and PDZ:PSD groups.**

| Sequence name | Gene name | Protein name                                          | UP | PSD: ZDF |         | PDZ:PSD |         |
|---------------|-----------|-------------------------------------------------------|----|----------|---------|---------|---------|
|               |           |                                                       |    | FC       | p-value | FC      | p-value |
| Q7TNM3        | OMG       | Oligodendrocyte-myelin glycoprotein                   | 7  | 1.42     | 0.0127  | 0.77    | 0.0290  |
| P02650        | ApoE      | Apolipoprotein E                                      | 5  | 1.34     | 0.0421  | 0.83    | 0.0359  |
| P63086        | Mapk1     | Mitogen-activated protein kinase 1                    | 3  | 1.32     | 0.0192  | 0.80    | 0.0295  |
| G3V9B3        | Mag       | Myelin-associated glycoprotein                        | 10 | 1.25     | 0.0017  | 0.83    | 0.0041  |
| G3V6P8        | Gng12     | Guanine nucleotide-binding protein subunit gamma      | 3  | 0.82     | 0.0103  | 1.23    | 0.0009  |
| F1M6X5        | Txnrd2    | Thioredoxin reductase 2, mitochondrial                | 6  | 0.78     | 0.0449  | 1.32    | 0.0462  |
| Q6TUG0        | Dnajb11   | DnaJ homolog subfamily B member 11                    | 1  | 0.72     | 0.0287  | 1.37    | 0.0423  |
| F8WG67        | Acot7     | Acyl-CoA thioesterase 7, isoform CRA_a                | 3  | 0.71     | 0.0040  | 1.28    | 0.0352  |
| P56522        | Fdxr      | NADPH:adrenodoxin oxidoreductase, mitochondrial       | 9  | 0.68     | 0.0084  | 1.33    | 0.0155  |
| Q9R170        | Bcat1     | Branched-chain-amino-acid aminotransferase, cytosolic | 3  | 0.68     | 0.0341  | 1.28    | 0.0449  |
| Q6PDU7        | Atp51     | ATP synthase subunit g, mitochondrial                 | 3  | 0.64     | 0.0007  | 1.42    | 0.0414  |
| P04631        | S100b     | Protein S100-B                                        | 4  | 0.64     | 0.0053  | 1.73    | 0.0095  |
| B0BNK1        | Rab5c     | RAB5C, member RAS oncogene family                     | 4  | 0.63     | 0.0087  | 1.41    | 0.0138  |
| D3ZQQ5        | Dnm1      | Dynamin-1                                             | 4  | 0.60     | 0.0133  | 1.50    | 0.0445  |
| Q9JHL4        | Dbnl      | Drebrin-like protein                                  | 1  | 0.59     | 0.0112  | 1.44    | 0.0461  |
| Q6P7S0        | Pkm       | Pyruvate kinase                                       | 2  | 0.58     | 0.0106  | 1.51    | 0.0267  |
| Q6AYT7        | Abhd12    | Monoacylglycerol lipase ABHD12                        | 1  | 0.56     | 0.0410  | 2.07    | 0.0453  |
| P84817        | Fis1      | Mitochondrial fission 1 protein                       | 2  | 0.53     | 0.0175  | 1.70    | 0.0418  |
| P04797        | Gapdh     | Glyceraldehyde-3-phosphate dehydrogenase              | 1  | 0.46     | 0.0095  | 1.67    | 0.0473  |
| Q06QE9        | ND2       | NADH-ubiquinone oxidoreductase chain 2                | 1  | 0.42     | 0.0158  | 1.66    | 0.0315  |
| Q6Q0N1        | Cndp2     | Cytosolic non-specific dipeptidase                    | 3  | 0.33     | 0.0048  | 2.27    | 0.0088  |
| G3V6U3        | Alg2      | ALG2, alpha-1,3/1,6-mannosyltransferase               | 3  | 0.31     | 0.0033  | 2.87    | 0.0070  |

The color gradient of green and yellow were used to visualize the increased or decreased abundances, respectively.

**Supplementary Table 5. Antibodies applied in Western blotting (WB).**

| <b>Antibody</b>       | <b>WB Dilution</b> | <b>Catalog No.</b> | <b>Provider</b>           |
|-----------------------|--------------------|--------------------|---------------------------|
| anti-FACL4            | 1:1000             | ab155282           | Abcam                     |
| anti-cytochrome c     | 1:500              | 4280               | Cell Signaling Technology |
| anti-alpha tubulin    | 1: 1000            | ab176560           | Abcam                     |
| anti-KDEL             | 1:1000             | ADI-SPA-827-D      | Enzo Life Sciences        |
| anti-IP3 receptor 1   | 1:1000             | 8568               | Cell Signaling Technology |
| anti-VDAC             | 1:1000             | 4866               | Cell Signaling Technology |
| anti-PKM              | 1:500              | ab38237            | Abcam                     |
| anti ERK2             | 1:1000             | ab32081            | Abcam                     |
| anti-apolipoprotein E | 1:500              | ab183597           | Abcam                     |
| anti-GAPDH            | 1:1000             | 5174               | Cell Signaling Technology |
| anti-ALG2             | 1:1000             | ab183597           | Abcam                     |
